## Erratum

### **Fluorescence recovery after photobleaching reveals that LPS rapidly transfers from CD14 to hsp70 and hsp90 on the cell membrane**

Triantafilou, K., Triantafilou, M., Ladha, S., Mackie, A., Fernandez, N., Dedrick, R. L. and Cherry, R. (2001). *J. Cell. Sci.* **114**, 2535-2545

The order of authors of the paper is incorrect in the printed version. The correct list of authors is shown below and in the PDF file:

Kathy Triantafilou, Martha Triantafilou, Shab Ladha, Alan Mackie, Russell L. Dedrick, Nelson Fernandez and Richard Cherry.
